# Supplementary material for: Incorporating a gender lens into nutrition and health-related policies in Fiji: analysis of policies and stakeholder perspectives
Source: Int J Equity Health. 2022 Oct 15;21:148. doi: 10.1186/s12939-022-01745-x (PMC9569111; doi:10.1186/s12939-022-01745-x)
Supplement: Supplementary file 1 — Additional file 1: Supplementary table 1. Policy content analysis and WHO gender analysis, data extraction. [file 12939_2022_1745_MOESM1_ESM.xlsx]

## Sheet: Sup table 1 
	McKenzie BL, Waqa G et al. Incorporating a gender lens into nutrition and health-related policies in Fiji: a policy analysis. 2021
	Supplementary table 1. Policy content analysis and WHO gender analysis, data extraction						1. Gender, existing content				2. Identifying opportunities - assessment based on the WHO Gender Assessment Tool
Types of documents	Title	Year endorsed and timeframe for policy	Type of policy document (e.g. Strategy, Ministerial Order etc)	Stated policy objectives	Ministry responsible	Other Ministries named	Explicit consideration of gender in policy goals and activities?	How are men, women and other groups represented?	Is there consideration of evidence that includes gender?	Information on consultation process and gender of participants?	Do the vision, goals or principles have an explicit commitment to promoting or achieving gender equality?	Does the policy or programme include sex as a selection criterion for the target population?	Does the policy or programme clearly understand the difference between sex and gender?	Does the target population purposely include both women and men?	Have women and men participated in the following stages? Design Implementation Monitoring and evaluation	Do both male and female team members have an equal role in decision-making?	Does the policy or programme consider life conditions and opportunities of women and men?	Does the policy or programme consider and include women’s practical and strategic needs?	Have the methods or tools been piloted with both sexes?	Does the policy or programme consider family or household dynamics, including different effects and opportunities for individual members, such as the allocation of resources or decision-making power within the household?	Does the policy or programme include a range of stakeholders with gender expertise as partners, such as government affiliated bodies, national or international non governmental organizations or community organizations?	Does the policy or programme collect and report evidence by sex?	Is the evidence generated by or informing the policy or programme based on gender analysis?	Does the policy or programme consider different health needs for women and men?	Does the policy or programme include quantitative and qualitative indicators to monitor women’s and men’s participation?	Does the policy or programme consider gender-based divisions of labour (paid versus unpaid and productive versus reproductive)?	Does the policy or programme address gender norms, roles and relations?	Does the policy or programme exclude (intentionally or not) one sex but assume that the conclusions apply to both sexes?	Does the policy or programme exclude one sex in areas that are traditionally thought of as relevant only for the other sex, such as maternal health or occupational health?	Does the policy or programme treat women and men as homogeneous groups when there are foreseeable, different outcomes for subgroups, such as low-income versus high-income women or employed versus unemployed men?	Do materials or publications portray men and women based on gender-based stereotypes?	Does the language exclude or privilege one sex?
National Development Plan (Whole of Government)	5-Year & 20-Year National Development Plan	2017 - 2021 (5-year) and 2017 - 2036 (20-year)	Strategic short- and long-term plan	The 20-year long-term national development plan, supported by Fiji’s strengths and an enabling national environment, is translated into individual sector development plans to be implemented over the 5 year blocks.	Ministry of Economy	Ministry of Labour; Ministry of iTaukei Affairs, Ministry of Agriuculture, Ministry of Rural Affairs; Ministry of Health; Ministry of Education	Women in Development (Pg. 55): Women make up around half of Fiji’s total population. Their potential needs to be fully harnessed for the benefit of the entire nation. Government will provide equal opportunities for all, including the participation of women in education, leadership, and overall economic development, and will continue its strong efforts to eliminate violence against womenIn the lab…	Collectively.	Women in Development (Pg. 55): Female representation in Parliament increased at the last election and is now one of the highest in the Pacific region. Around 58 percent of SOEs have women representation at board level. In the labour market, women account for over 40 percent of salary earners and 30 percent of wage earners. Equal opportunities in education, health and other social services will ra…	Not covered.	Vision: "Transform Fiji towards an even more progressive, vibrant, and inclusive society" In the 5 year strategy: One specific goal is "empowering women to reach their full development potential", within this gender equality and SDG 5 are discussed/highlighted. Gender equality is also highlighted under the "Social Development" goal Gender equality is also highlighted (along with climate change, g…	No. The plan is targeted at the Fiji population as a whole, although for some of the goals women are highlighted as the target population.	No. Definitions of terms used are not stated. "Women" and "females" used inerchangeably, term "men" used.	Covers women and men (all of the Fiji population). For some of the specific goals i.e. social development and empowering women, women are a traget population.	Not explicitly stated.	Unclear	For women, there is a strong focus on reproductive health, working opportunities (and general social development), and reducing physical/sexual violence against women (and children). Conditions and opportunities are less clear for men, however in the way that women's opportunities are discussed it seems men are used as the reference "normal" comparator. E.g. "The intelligence and capability of wo…	Yes. (as highlighted, through specific goals within the social development and women's empowerment goals)	Unclear	To some extent, as covered in the below quotes: "It is expected that home duties in caring for children and household work will be shared by the spouse or partner." "Promotion of traditional handicrafts, natural body products, local ceramic ware, and exotic herbs and spices will be nurtured and expanded, offering more opportunities for women to use their traditional skills to expand opportunities…	Unclear, specific strategies do state that work should be conducted between relevant ministries (i.e Ministry of Women & Children and Poverty Alleviation) and NGOs, but the exact NGOs are not highlighted.	The intention is set is to collect and report sex (and age) disaggregted data.	Gender analysis is not stated, although some gender specific results have been quoted (e.g. women and men with anaemia, and numbers of women in parliament)	Yes, a range of gender specific needs are covered.	Unclear, but the plan seems to be based on quantitative data.	To some extent: "It is expected that home duties in caring for children and household work will be shared by the spouse or partner."	It acknowledges and aims to address some gender norms/roles/relations e.g. "Support for women’s health and decisions regarding family planning and sexual and reproductive health will be shared and respected. Access to health and other social services will be improved and available as required. Women will be included and consulted in all planning for future development projects, and their input wi…	No.	To some extent. Men seem to be excluded from the aims to reduce sexual violence (i.e. the focus is on women being subjected to sexual violence). Reproductive health almost exclusively focuses on women, although there is acknowledgement that decision making and roles and responsibilities around child care should be shared.	Different groups with potential different inequalities are considered seperately to women/men.	To some extent e.g. within the publication plan women and men are depicted in the following ways: Women: in field, holding a child, as a nurse, working in a computer lab, women soldiers, selling food at a market, weaving, (girls at school) Men: in tractor, (boys at school), male soldiers, on a bus, fishing, performing cultural dance	No.
Health	Non-Communicable Diseases Strategic Plan	2015-2019	Strategic Plan	Overall objectives (Pg.13) :  Reduced intake of salt per person aged 18+ years by 20% by 2019  Increased daily average serves of fruit and vegetables among adolescents and adults by 10% by 2019  No increase in obesity prevalence in adults or adolescents  No increase in diabetes prevalence in adults  Prevalence of insufficiently physically active adolescents reduced by 5% by 2019  Prevalence…	Ministry of Health	MIT; Ministry of Information and Communications, NFNC, Wellness Unit, Ministry of Education, Ministry of iTaukei Affairs, Ministry of Women; Ministry of Industry and Trade; Ministry of Primary Industries	No mention to specific gender targets.	Collectively as a population		Annex 1 (Pg. 39) gives an outline of consultation process for the development of the Plan; the workshop gives a list of names with Mr, Ms, Dr. etc. Of the Mr & Mrs, females represent approximately 50% of the participants.	No. Goal of strategy: "To contribute to the overall goal of a healthier Fiji, and specifically to achieve a 25% reduction in premature mortality from the four key NCDs by 2025"	No, general population is targeted	No. Gender differences (i.e. in injury, obesity and smoking prevalence) mentioned in the background.	Covers the whole population (not purposely women and men)	Some indication that women were involved in the consultation process for the development of the plan. he workshop gives a list of names with Mr, Ms, Dr. etc. Of the Mr & Mrs, females represent approximately 50% of the participants.	Unclear	No. Some gender differences are mentioned in the background, but these have not been incorporated into the strategy.	No.	Unclear	No.	Ministry of Social Welfare, Women and Poverty Alleviation and Women's Crisis Centre are included.	Only specified for cancer: "Incidence of cancer, total and disaggregated by type and sex" Note, they do say that WHO STEPs surveys will be used for monitoring, and these surveys disaggregate data.	Unclear (given lack of gender mentioned I would assume "no"?)	No.	No.	No.	No.	No.	No.	Yes.	Not applicable.	No.
	National Strategic Plan	2020 - 2025	Strategic Plan	Ultimate goal: Universal Health Coverage Three strategic goals (page 19): Strategic Priority 1: Reform public health services to provide a population-based approach for diseases and the climate crisis Strategic Priority 2: Increase access to quality, safe and patient-focused clinical services Strategic Priority 3: Drive efficient and effective management of the health system	Ministry of Health	None.	Outcome 1.2 – Improve the physical and mental wellbeing of all citizens with particular emphasis on women, children and young people through prevention measures. Also references gender policy	Pregnant women are mentioned as a "vulnerable" group, and also specifically mentioned interms of maternal health (during pregnancy)	Yes. Page 8, Background. "Gender and disability gaps negatively affect individuals – Gaps include negative cultural and social practices, and gender-based violence. To rectify this situation, the well-being of women, children, adolescents and people living with disabilities is at the centre of health care and achieving the SDGs" "	Consultation process describe, but details based on gender not provided.	No, However, they make reference to gender equality being a cross-cutting policy, that has the aim to achieve gender equality. They do have a strategic priority that included an objective specific to women: "Improve the physical and mental well-being of all citizens with particular emphasis on women, children and young people through prevention measures."	No.	No. Note, only the term gender, women and men are used in the plan	Not purposely.	Unclear (information not provided) .	Unclear	Yes. Discussion on gender equity in the workforace, having a particular emphasis on women in health prevention measures, and the encouragement of men in seeking health advice.	Yes, (Outcome 1.2. "Reduced the number of inpatients presenting symptoms of CDs and NCDs, especially women, children and young people.")	Unclear.	No.	Not enough information provided. States that they will d the following: "We will focus on ensuring better collaboration with other government departments on key health-related and SDG issues, including the Ministry of Education, Ministry of Women, Children and Poverty Alleviation, Ministry of Agriculture, Ministry of Rural Development, Ministry of Youth and Sports, and Police Force, to name a few…	Not specified.	Yes, and references the National Gender Policy.	Yes. Discussion on gender equity in the workforace, having a particular emphasis on women in health prevention measures, and the encouragement of men in seeking health advice.	No.	No.	No.	UC. The policy is broad, assumes coverage of all Fijians.	Yes, maternal health is focused specifically on women	Yes.	Not applicable.	No.
	DRAFT FIJI Policy on Food and Nutrtion Security (FPFNS)	2018-2022 NOTE: THIS POLICY IS NOT YET ENDORSED. THE COPY USED FOR THE POLICY CONTENT ANALYSIS IS A DRAFT FROM 2018.	Policy	Pg.1/2: 1) Improve multi-sector leadership, ownership and co-ordination of national food security and nutrition action: to create an effective institutional and legal framework for management and mobilization of sufficient resources and actions to achieve improved national food and nutrition security. 2) Enhance and promote sustainable, diversified and resilient food systems: to promote the adopt…	National Food and Nutriion Centre (MoMHS) (Now the Wellness Division).	The multisectoral policy acknowledges the equal and collective input to the objectives and actions contained within it to be from six key ministries: 1. Ministry of Agriculture (MOA) 2. Ministry of Health and Medical Services (MoHMS) 3. Ministry of Women, Children and Poverty Alleviation (MOWPA) 4. Minsitry of Industry, Trade and Tourism (MITT) 5. Minsitry of Youth and Sports (MOYS) 6. Ministry o…	Pg. 2.0 BACKGROUND 2.11 - According to FAO, women produce between 60-80% of food in most developing countries and are responsible for half the world’s food production. Yet their key role as food producers and providers and their critical contribution to household food security is only recently becoming recognized (World Bank, 2015). Globally, it has been estimated that if women were given the sam…	Mostly, the policy addresses Fijians as the population however there are (see previous cell) special mention of women, and represented as equal parts of the Fijian community, particualry playing an important role in food production and market vendors.	Yes.Pg 2: BACKGROUND: 2.11 - According to FAO, women produce between 60-80% of food in most developing countries and are responsible for half the world’s food production. Yet their key role as food producers and providers and their critical contribution to household food security is only recently becoming recognized (World Bank, 2015). Globally, it has been estimated that if women were given the …	No indication of named individuals or their gender is available with this draft.	No. Not an explicit commitment, however they do say that "Reducing the triple burden of malnutrition is a huge challenge that cuts across multiple sectors, including health, agriculture and food systems, water and sanitation, education, gender and trade." they also acknowledge that women are the main food producers in LMICs, but generally have less resource and less control of money.	No. The policy is targeted at the Fiji population as a whole.	No. Definitions of terms used are not stated. "Women" and "females" and "men" and "males" used interchangably.	Not purposely, however as the vision for the policy is "to ensure every Fijian has access to safe, sufficient nutritious foods…" both women and men are within the target population.	Yes, both women and men have been involved in the design of the policy, and the steering committee includes both women and men. However, the gender of people who participated in the consultation process is not known. Note, only the design phase is relevant for this policy.	Unclear	Unclear	Women's practical and strategic needs are considerd in the background ("Globally, it has been estimated that if women were given the same access to resources as men, they can increase food production and economic growth by 20 -30% and undernutrition could decline by 12- 17% (FAO, 2011). Research shows that resources and income flows that women control have positive impacts on nutrition because th…	Not applicable (draft policy).	Yes. In the background: "Globally, it has been estimated that if women were given the same access to resources as men, they can increase food production and economic growth by 20 -30% and undernutrition could decline by 12- 17% (FAO, 2011). Research shows that resources and income flows that women control have positive impacts on nutrition because they are more likely to be directed towards food,…	Stakeholders with gender related remits: -Ministry of Women, Children and Poverty Alleviation -FAO	Data related to this policy is yet to be collected. Evidence used to inform the policy (and quoted in the policy) includes sex specific data.	Unclear	Policy reflects on the requirements of women of childbearing age (specifically micronutrient requirements) - no further health needs/differences are highlighted. (see also strategic action plan: 2 c) Provide select women groups training on simple farming techniques and skills to establish home gardens and produce consistent supply of nutritious food for home consumption and sale 5: Enhance matern…	No.	UC.	No. Some gender norms/roles/relations are highlighted in the background, these are not addressed in the policy actions (e.g. discussion re resource allocation and power in the background, not carried through to the strategy actions)	UC. The policy is broad, assumes coverage of all Fijians.	Yes. In action 5 "Enhance maternal, infant, young child and adolescent nutrition" only pregnant/non-pregnant women are referred to.	Yes.	Not applicable.	No.
	Wellness Policy	? Current	Policy	The MoHMS will cooperate with the NWC in developing a multi-sectorial National Wellness Strategic Plan 2015-2019 within at least 12 months from approval of this Policy; Within the timeframe of the National Wellness Strategic Plan 2015-2019 (to be written), the NWC will take action to: 2. Establish a National Multi-Sectorial Wellness Team (described in Leadership/governance) which will champion th…	Ministry of Health	Whole of Government' approach	Pg. 6 - The policy's guiding principles list gender equity as one factor. 'The policy will ensure that men, women, boys and girls are considered equally in the planning and implementation processes of all Wellness initiatives and programs.'	All Fijians are represented as equal and as the 'population.'	Only in the guiding principle of gender equityt.	The consultation process is described in the Annex, and the contributing senior officials were named.	Yes, one of the guiding policy principles: "Gender equity – the policy will ensure that men, women, boys and girls are considered equally in the planning and implementation processes of all Wellness initiatives and programs."	No.	No. Note, only the term gender, women and men are used in the policy	Not purposely. Specifies that benefits will be for all the population.	Evident that women and men participated in the design of the policy (from the annex on the consultation process), however, not possible to quantify this involvement.	Unclear.	No.	No.	Unclear	No.	Yes	Unclear	Unclear	No.	Unclear	No.	No.	Unclear	No. Note, this seems to be a very general/high level document.	Yes.	Not applicable.	No.
Trade	Fijian Trade Policy Framework	2015-2025	Framework	Pg 11. Policy Objectives: 1. To transform Fiji into a vibrant, diversified and internationally competitive export-led growth oriented economy; 2. To facilitate the engagement of Fiji in bilateral, regional and multilateral trade frameworks; 3. To use trade policy to contribute to creating the conditions for the sustained increase in the contribution of investment and the increase in total factor …	Ministry for Industry, Trade & Tourism	Fijian Government.	Pg. 55 - Ensure that the Trade Policy Framework takes account of the relevant provisions of the National Gender Policy; and Ensure representation of the Department of Women in the NTDC subcommittees; Pg. 49 - Gender - The Government will work towards using trade policies to complement inclusive growth policies in order to increase the potential for reversing the widening of Fiji’s gender gap and …	Not indicated.	Yes. Pg 49 - Gender - The quality of Fiji’s trade policies and its implementation will directly determine the positive and negative impact they will have on women and their welfare. This is important given the declining state of gender equality in Fiji where according to the latest Global Gender Gap Report 2013, Fiji’s ranking dropped from 103 in 2009 to 117 in 2013, particularly in terms of econ…	No.	Yes, although is focused on referencing/mainstreaming the broader gender policy. Pg 11. Policy objectives: "To facilitate the mainstreaming of gender, environmental protection and other related policies to ensure coordination and policy coherence."	Unclear. Pg 49 states: "In order to enhance the mainstreaming of gender policy into the Trade Policy Framework, preparation for a mid-term review of the Trade Policy Framework will take into account gender aspects when analysing the performance of current trade agreements, i.e MSG."	Unclear. Only gender is used	Unclear	Unclear. Although in terms of implementation it states: "Ensure representation of the Department of Women in the NTDC subcommittees" (pg 55)	Unclear	Life condititions/the disadvanage of women are considered in section 9.15. Also included in terms of the reference to the National Gender Policy (pg 49)	Yes (pg 49)	Unclear	No *although does reference the National Gender Policy	No. H/e does state to "Ensure representation of the Department of Women in the NTDC subcommittees"	Not specified.	To some extent. E.g. informed by the 2013 Global Gender Gap Report 2013 (pg 49)	No *although does reference the National Gender Policy	Unclear	No *although does reference the National Gender Policy	No *although does reference the National Gender Policy	No	No. (Not applicable?)	To some extent, although does state on pg 49 "The interests of women (as well as other disadvantaged groups) will be taken into account in trade policy formulation and trade negotiations."	No. (Not applicable?)	The focus (particularly within the gender specific sections) seem to refer to women as the "other" i.e. the gender section only focuses on the disadvantage of women.
Agriculture	Fiji 2020 Agriculture Secotr Policy Agenda	2014	Sector Policy Agenda (?)	Pg. 18: After analyzing the translated agriculture development objectives, the core objectives identified are as follows: a) Build modern agriculture in Fiji as an organized system of producing, processing, and marketing crops, livestock, and aquaculture products. b) Develop integrated production, processing, energy, and transport infrastructure support system for agriculture. c) Improve delivery…	Minsitry of Agriculture (MoA)	FAO Technical Assistance; Ministry of Strategic Planning, National Development and Statistics (MSPNDS); The Asian Development Bank; EU, SPC	Pg 5. mentions: 'In line with enhancing capabilities to generate fund and to secure investment, strategies include publicprivate partnership, innovative business models, the promotion of business arrangements with farmer ownership and accountability, the investment in new ventures, strengthening international trade and marketing, and the creation of investment fund for retirees, women, and youth …	Not differentiated.	No.	No.,	No.	No.	Not stated (only women referred to)	No.	Mainly men have participated in policy development (per stakeholder and consultation list, counting "Mr" vs "Mrs/Ms"	Unclear	No.	To some extent - there is an aim to set up an investment fund for "retirees, women, and youth" to aid attraction to the farming industry. (pg 13)	Unclear	No.	No.	Not specified.	Not specified.	No.	No.	No.	No.	Unclear.	Yes, women are largely excluded from the policy actions.	Yes.	Not applicable.	No.
Gender	Fiji National Gender Policy	Not given	Policy	Improve the quality of life of men, women, boys and girls, at all levels of society through the promotion of gender equity and equality.  Reinforce the inextricable links between gender equality and sustainable development goals in national development.  Promote active and visible gender mainstreaming in all sectors and within civil society to ensure agency for gender equity and equality in all…	Ministry of Social Welfare, Women and Poverty Alleviation	Ministry of Labour; Ministry of iTaukei Affairs, Ministry of Agriuculture, Ministry of Rural Affairs					Yes. The overall goal of this policy is to promote gender equity, equality, social justice and sustainable development in the Republic of Fiji. The Government of Fiji is committed to removing gender inequality in Fiji. This Policy, endorsed by Cabinet, aims to:  Improve the quality of life of men, women, boys and girls, at all levels of society through the promotion of gender equity and equality…	Yes. "Promoting an approach that is grounded in research, based on age and sex disaggregated data collection, and a gender analysis of roles and social relations of women and men"	Yes, although in general throughout the policy gender is referred to as a binary term (e.g. "women" and "men"	Yes, all women and men within Fiji are (explicitly) the target population for this policy.	Yes. Design: 37 out of the 55 stakeholders consulted on the policy were female (i.e. 71%) - Appendix 1	Unclear	Yes. Particularly in the sections regarding family roles and responsibilities, and employment.	Yes, covered under each sub-section (i.e. 5.1 - 5.19)	Unclear	Yes (see section 5.6 Families) however, gender differences in decision-making power isn't a strong focus, or explicitly stated.	Yes, a range of stakeholders are included. However, monitoring meetings (with stakeholders invited) are only held every 4 years. Ministry of Social Welfare, Women and Poverty Alleviation AusAID UN Women PPSEAWA Fiji Police Force Ministry of Defence Pacific Centre for Peacebuilding Medical Services, Pacific Empower Pacific UNFPA Public Service Commission Ministry of Finance Ministry of Itaukeu Aff…	States that data should be collected and reported by sex	Yes. Stated that policy is informed by gender based analyses (however, these are not referenced)	Yes. Particularly through section 5.12 Access to Health Services	Unclear	Yes. Particularly through 5.6 Families.	To some extent (section 5.6), however, addressing differences in responsibilities/decision making power isnt a clear focus.	No	To some extent. There is some focus on including men in reproductive health (e.g. father's involvement in pre-natal, birthing and post-natal activities), however the focus of responsibilty is still on females.	No, there is a focus on intersectionality	No. Stated strategy: "Promoting a balanced and non-stereotyped portrayal of women in the media through training."	No
Education	Fiji School Health Policy	2016 (to be reveiwed every two years)	Policy	Wellness activities are supported and implemented in all schools through inclusion in the school curriculum by Ministry of Education, Heritage and Arts (MoEHA). 1.2.2 Integrated approach to School Health Programs (SHPs) within the Ministry of Health & Medical Services’ (MoHMS) public health programs. 1.2.3 Strengthened multi-sectorial collaboration and coordination of wellness activities targetin…	Ministry of Health Public Health Division to take the lead role and the Ministry of Education will be responsible for the monitoring (Corporate Services Section).	None specifically. (other than those within health and education, that is).	N/A	N/A	N/A	Not covered.	No	Not stated.	Not stated	Not stated (includes children, broadly)	Information not given	Not covered.	No (specific to children)	No (specific to children)	Not stated	No	Unclear, states: "Both the MoHMS and MoEHA need to develop a collaborative approach with other stakeholders to ensure that the health and wellness of children is given prominence."	Not	Not specified.	No (different needs for girls and boys not covered)	No.	No	No	UC	UC	Yes (boys and girls are considered collectively)	Images only include boys	No
	Policy on Food and School Canteens	2017 (unclear if this is still current but Ateca has confirmed it is).	Policy	1. Clear procedures and expectations by the Ministry of Education, Heritage and Arts (MoEHA) for canteens and where operators or School Heads and teachers are to engage collaboratively towards the provision of healthy food an beverages in the school canteen and to promote health food environments in the school. 2. Supports the principles taught in various year levles which aim to promote healthy …	Ministry of Health & Ministry of Education	n/a	Not covered	Not mentioned	No.	Not covered.	No	No stated	Not stated	Not stated (includes children, broadly)	Unclear	Not covered.	Not covered	No (specific to children)	No stated	No (potentially NA)	Unclear (not covered)	No - evidence collection not stated	Not specified.	No	No.	No (potentially NA)	No	UC	UC	Yes	Women and men (girls and boys) are not portrayed	No
Fiscal	Fiscal Policy (Budget)	2019	Supplement to the 2019-2020 Budget Address	The 2019-2020 Supplement to the Budget Address provides an overview of Fiji’s current macroeconomic and fiscal position and projections for the next three years. It also outlines Government’s overall fiscal strategy and direction for the medium term, which is geared towards achieving inclusive economic growth and fiscal sustainability. The post disaster reconstruction works resulted in higher fis…	Ministry of Economy	The Budget report was compiled by the Ministry of Economy in consultation with Government ministries, the Fiji Revenue and Customs Service, the Reserve Bank of Fiji and other Government agencies.	Pg. 61: The Social Services sector is expected to receive the largest support in Aid In Kind (AIK) donations in 2019-2020, worth around $58.5 million. A proportion of these funds will go to the Pacific Women Shaping Pacific Development Program.	Not mentioned.	Not mentioned.	Not covered.	Not within the goals h/e in terms of activities the following are listed (PwC Budget report, pg 36): - Women's plan of action (WPA): "The taskforce would review the WPA, conduct activities under its five thematic areas and establish a new thematic area, ‘Gender and Climate Change’. Budget allocation $0.9 million." - Fiji National Women's Expo: "The Expo provides a platform for rural women to sell…	Not stated.	Not stated (only women referred to)	Not stated.	Not covered.	Not covered.	To some extent (through the activities funded)	To some extent (through the activities funded)	Unclear	No.	Unclear (not covered)	Not specified.	Not specified.	To some extent (e.g. domestic violence)	Unclear	No.	No.	No.	Unclear.	Unclear.	Not applicable.	No.
